# Supplementary material
Source: Springer Nature journal article supplement (https://www.springermedizin.de/resource/supplementary/12985_2010_968_MOESM5_ESM.pdf/9608850)
Supplement: MOESM5 [file 9608850]

DEV DDQLDGDN-----IYYPGESVYLG---RGSIRGGQQPL  
EHV-1 DATTRDDLEG-----IYYPGER---S---PRPGER-----  
EHV-4 DANTRDDIEG-----IYYPGER---S---PRPVER-----  
PRV PTP-----YYAPAA---P---PQLLPP-----  
VZV DQRELDSE-----FYSGES-----QMDG-----  
BHV-1 DHPRGRSGGGDDDEAYYPGEG---A---PAELPP-----  
BHV-5 EPLRSRGGG---DDEAYYPGEG---A---PAELPP-----  
HSV-1 DQDEPDA-----DYPYYPGEARGA---PRGVDS-----  
HSV-2 GRDEPDR-----DFPYYPGEARPE---PRPVDS-----  
CeHV-1 DYDDRD-----DAPYYPGEARAP---PRVVPDSGGRGR  
CeHV-2 DHDDRD-----DAAYYPGEARAP---RFAPDSAG---R  
MDV-1 DRSIESD-----LYYPGEFRRSNFSPPQASSMKYEET  
MDV-2 DKSPEQE-----PYYPGEFQQS-----EHRNLRCEDG  
HVT DKYDEPD-----LYYPGELSRH---EPHYEGEGKNVGP  
ILTV HPN-----YYSSNFG-----QFPG-----
